# Supplementary material for: Relationship between Groundwater Nitrate Concentration and Density of Onsite Wastewater Treatment Systems: Role of Soil Parent Material and Impact on Pollution Risk
Source: Atypon-hosted journal article supplement (doi:10.1061/jswbay.sweng-547), 2024-05-03
Supplement: supplemental_materials_jswbay.sweng-547_dowling.pdf [file supplemental_materials_jswbay.sweng-547_dowling.pdf]

## SUPPLEMENTAL MATERIALS

*ASCE Journal of Sustainable Water in the Built Environment*

# Relationship between Groundwater Nitrate Concentration and Density of Onsite Wastewater Treatment Systems: Role of Soil Parent Material and Impact on Pollution Risk

Matthew J. Dowling, Jose A. Amador, Seaver Anderson, Stefan Bengtson, Kristen Hemphill, and George W. Loomis

**DOI:** 10.1061/JSWBAY.SWENG-547

© ASCE 2024

[www.ascelibrary.org](http://www.ascelibrary.org)

**Table S1.** Soil series corresponding to till and glacial fluvial parent material

| Soil parent material   | Soil series                                                        | Symbol | C Horizon Ksat ( $\mu\text{m/s}$ ) <sup>a</sup> | Drainage class <sup>a</sup> |
|------------------------|--------------------------------------------------------------------|--------|-------------------------------------------------|-----------------------------|
| <b>Till</b>            | Canton-Urban land complex                                          | CB     | 42-141                                          | Well drained                |
|                        | Canton and Charlton very stony fine sandy loams 3 – 8% slopes      | ChB    | 42-141                                          | Well drained                |
|                        | Canton and Charlton very stony fine sandy loams 8 -15% slopes      | ChC    | 4.0-141                                         | Well drained                |
|                        | Gloucester-Hinckley very stony sandy loams, rolling                | GhC    | 42-703                                          | Excessively drained         |
|                        | Gloucester-Hinckley very stony sandy loams, hilly                  | GhD    | 42-703                                          | Excessively drained         |
|                        | Ridgebury, Whitman, and Leicester extremely stony fine sandy loams | Rf     | 0.01-141                                        | Poorly to V. poorly drained |
|                        | Bridgehampton- Charlton complex, very stony, 0 – 8% slopes         | BnB    | 4.0-42                                          | Well to Mod. well drained   |
|                        | Wapping very stony silt loam, 0 – 8% slopes                        | WcB    | 14-141                                          | Mod. well drained           |
| <b>Glacial fluvial</b> | Enfield silt loam, 0 – 3% slopes (EfA)                             | EfA    | 42-703                                          | Well drained                |
|                        | Freetown mucky peat, 0 – 2% slopes                                 | FeA    | Mod. high-high                                  | Very poorly drained         |
|                        | Hinckley-Enfield complex, rolling                                  | HnC    | 42-703                                          | Excessively drained         |
|                        | Hooksan sand 3 – 8% slopes                                         | HsB    | Very high                                       | Very poorly drained         |
|                        | Matunuck mucky peat                                                | Mk     | 14-705                                          | Very poorly drained         |

|                                   |     |                |                              |
|-----------------------------------|-----|----------------|------------------------------|
| Merrimac sandy loam 3 – 8% slopes | MmB | 42-703         | Somewhat excessively drained |
| Merrimac sandy loam 0 – 3% slopes | MmA | 42-703         | Somewhat excessively drained |
| Merrimac- Urban land complex      | MU  | 42-703         | Somewhat excessively drained |
| Scarboro mucky sandy loam         | Sb  | 42-703         | Very poorly drained          |
| Sudbury sandy loam                | Ss  | 42-703         | Moderately well drained      |
| Swansea, mucky peat 0 – 2% slopes | SwA | Mod. high-high | Very poorly drained          |
| Tisbury silt loam                 | Tb  | 42-703         | Moderately well drained      |
| Udorthents - Urban land complex   | UD  | Not applicable | Not applicable               |

---

Source: Data from Soil Survey Staff (2023).

<sup>a</sup> Saturated hydraulic conductivity (Ksat) values and drainage class from Soil Survey of Rhode Island (1981).

## Reference

Soil Survey Staff. 2023. Soil Survey Staff, Natural Resources Conservation Service, UnitedStates Department of Agriculture. Web Soil Survey. Available online at: <http://websoilsurvey.sc.egov.usda.gov/>. Accessed July 25, 2023.
